Articles of interest in other COB journals

From *Journal of Cell Science*

**Mechanically induced osteogenic differentiation – the role of RhoA, ROCKII and cytoskeletal dynamics**

Emily J. Arnsdorf, Padmaja Tummala, Ronald Y. Kwon and Christopher R. Jacobs

Arnsdorf, E. J. et al. 2009. *J. Cell Sci.* doi: 10.1242/jcs.036293

**Mars, a *Drosophila* protein related to vertebrate HURP, is required for the attachment of centrosomes to the mitotic spindle during syncytial nuclear divisions**

Gang Zhang, Manuel Breuer, Ankathrin Förster, Diane Egger-Adam and Andreas Wodarz

Zhang, G. et al. 2009. *J. Cell Sci.* doi: 10.1242/jcs.040352
